# Supplementary material
Source: PubMed Central journal article supplement (PMC9909454)
Supplement: EIJ-D-22-00306_Fabris_SD.pdf [file EIJ-D-22-00306_Fabris_SD.pdf]

## Supplementary data

### Supplementary Appendix 1. Methods: **inclusion and exclusion criteria.**

#### **Inclusion criteria**

1. Age  $\geq$  18 years
2. History of diabetes mellitus with any indication for angiography (stable angina or any type of acute coronary syndrome including ST-elevation MI).
3. Coronary angiography, including FFR and OCT imaging of at least one coronary de novo stenosis in a native not-grafted vessel with a visually estimated diameter stenosis of  $\geq 40 - \leq 80\%$  (target lesion)<sup>1</sup>. Target lesion should be other than the culprit lesion(s) in patients presenting with myocardial infarction (ST-elevation myocardial infarction or non-ST-elevation myocardial infarction).

#### **Exclusion criteria**

1. TIMI flow  $< 3$  in the target lesion(s)
2. Target lesion reference diameter (on visual estimation)  $< 2.0$  mm
3. Known left ventricular ejection fraction  $< 30\%$
4. Known malignancy
5. Life expectancy  $< 2$  years
6. Unwilling or unable to provide informed consent

**Supplementary Table 1. Medications at discharge, at 18-month follow-up, and up to 5-year follow-up.**

| <b>Variables</b>                          | <b>FFR(-)/TCFA(+)</b> | <b>FFR(-)/TCFA(-)</b> | <b>p Value</b> |
|-------------------------------------------|-----------------------|-----------------------|----------------|
| <b>Medications at discharge</b>           | n=98                  | n=292                 |                |
| Aspirin                                   | 87 (88.78%)           | 250 (85.62%)          | 0.50           |
| P2Y12 antagonist                          | 61 (62.24%)           | 132 (45.21%)          | <0.001         |
| Anticoagulation                           | 18 (18.37%)           | 56 (19.18%)           | 0.99           |
| ACE inhibitor                             | 43 (43.88%)           | 136 (46.58%)          | 0.73           |
| ARB                                       | 18 (18.37%)           | 76 (26.03%)           | 0.14           |
| Betablockers                              | 80 (81.63%)           | 211 (72.26%)          | 0.08           |
| Calcium antagonist                        | 32 (32.65%)           | 99 (33.90%)           | 0.90           |
| Digoxin                                   | 3 (3.06%)             | 6 (2.05%)             | 0.70           |
| Diuretics                                 | 34 (34.69%)           | 117 (40.07%)          | 0.40           |
| Insulin                                   | 38 (38.78%)           | 103 (35.27%)          | 0.55           |
| Oral anti-diabetic                        | 80 (81.63%)           | 226 (77.40%)          | 0.48           |
| Statin                                    | 74 (75.51%)           | 249 (85.27%)          | 0.031          |
| <b>Medications at 18-month follow-up</b>  | n=98                  | n=292                 |                |
| Aspirin                                   | 70 (71.43%)           | 197 (67.47%)          | 0.53           |
| P2Y12 antagonist                          | 24 (24.49%)           | 39 (13.36%)           | 0.017          |
| Anticoagulation                           | 17 (17.35%)           | 59 (20.21%)           | 0.66           |
| ACE inhibitor                             | 47 (47.96%)           | 117 (40.07%)          | 0.19           |
| ARB                                       | 20 (20.41%)           | 68 (23.29%)           | 0.68           |
| Betablockers                              | 68 (69.39%)           | 189 (64.73%)          | 0.46           |
| Calcium antagonist                        | 25 (25.51%)           | 80 (27.40%)           | 0.79           |
| Digoxin                                   | 4 (4.08%)             | 6 (2.05%)             | 0.28           |
| Diuretics                                 | 31 (31.63%)           | 103 (35.27%)          | 0.54           |
| Insulin                                   | 38 (38.78%)           | 99 (33.90%)           | 0.39           |
| Oral anti-diabetic                        | 66 (67.35%)           | 213 (72.95%)          | 0.30           |
| Statin                                    | 63 (64.29%)           | 221 (75.68%)          | 0.036          |
| <b>Medications up to 5-year follow up</b> | n=91                  | n=278                 |                |
| Aspirin                                   | 64 (70.33%)           | 173 (62.23%)          | 0.17           |
| P2Y12 antagonist                          | 18 (19.78%)           | 32 (11.51%)           | 0.053          |
| Anticoagulation                           | 20 (21.98%)           | 59 (21.22%)           | 0.88           |
| ACE inhibitor                             | 36 (39.56%)           | 113 (40.65%)          | 0.90           |
| ARB                                       | 15 (16.48%)           | 61 (21.94%)           | 0.30           |
| Betablockers                              | 61 (67.03%)           | 176 (63.31%)          | 0.61           |
| Calcium antagonist                        | 29 (31.87%)           | 88 (31.65%)           | 0.99           |
| Digoxin                                   | 4 (4.40%)             | 7 (2.52%)             | 0.48           |
| Diuretics                                 | 26 (28.57%)           | 85 (30.58%)           | 0.79           |
| Insulin                                   | 35 (38.46%)           | 85 (30.58%)           | 0.20           |
| Oral anti-diabetic                        | 64 (70.33%)           | 204 (73.38%)          | 0.59           |
| Statin                                    | 60 (65.93%)           | 205 (73.74%)          | 0.18           |

ACE indicates angiotensin-converting enzyme; ARB, angiotensin receptor blocker, FFR, fractional flow reserve; TCFA, thin-cap fibroatheroma
